# Supplementary material for: Prevalence of Diabetes in U.S. Youth in 2009: The SEARCH for Diabetes in Youth Study
Source: PubMed Central journal article supplement — Diabetes Care. 2014 Jan 11;37(2):402–8. doi: 10.2337/dc13-1838 (PMC3898760; doi:10.2337/dc13-1838), 2014-01-11
Supplement: supp_dc13-1838v131838_DC131838SupplementaryData.pdf [file supp_dc13-1838v131838_DC131838SupplementaryData.pdf]

## SUPPLEMENTARY DATA

Prevalence of Diabetes Mellitus in U.S. Youth in 2009: The SEARCH for Diabetes in Youth Study.

The writing group for this manuscript wishes to acknowledge the contributions of the following individuals to the SEARCH for Diabetes in Youth Study:

*California:* Jean M. Lawrence, ScD, MPH, MSSA, Kristi Reynolds, PhD, MPH, Jin-Wen Hsu, PhD, Mary Helen Black, PhD, Kim Holmquist, BA, and Harpreet S. Takhar, MPH, for the Department of Research & Evaluation and Ann K. Kershner, MD for the Department of Pediatrics, Kaiser Permanente Southern California; and David J. Pettitt, MD, for the Sansum Diabetes Research Institute

*Colorado:* Dana Dabelea, MD, PhD, Richard F. Hamman, MD, DrPH, Lisa Testaverde, MS, for the Department of Epidemiology, Colorado School of Public Health, University of Colorado Denver, Georgeanna J. Klingensmith, MD, Marian J. Rewers, MD, PhD, David Maahs, MD and Paul Wadwa, MD for the Barbara Davis Center for Childhood Diabetes, Stephen Daniels, MD, PhD, Kristen Nadeau, MD, Department of Pediatrics and Children's Hospital, Clifford A. Bloch, MD, for the Pediatric Endocrine Associates, Carmelita Sorrelman, MSPH, Alfreda Beartrack, MSPH for the Navajo Area Indian Health Prevention Program

*Ohio:* Lawrence M. Dolan, MD, Michael Seid, PhD, Elaine Urbina, MD, MS, Debra A. Standiford, MSN, CNP for the Cincinnati Children's Hospital Medical Center

*Carolina:* Elizabeth J. Mayer-Davis, PhD, Joan Thomas MS, RD for the University of North Carolina, Chapel Hill, Anwar Merchant, ScD, Angela D. Liese, PhD, MPH, Robert R. Moran, PhD, Gladys Gaillard-McBride, RN, CFNP, Deborah Lawler, MT (ASCP), Malaka Jackson, MD for the University of South Carolina, Deborah Bowlby, MD, for the Medical University of South Carolina, James Amrhein, MD, for Greenville Hospital Systems, Pam Clark, MD for McLeod Pediatric Subspecialists, Mark Parker, MD for Pediatric Endocrinology & Diabetes Specialists, Charlotte, NC

*Washington:* Catherine Pihoker, MD, Maryam Afkarian, MD, Angela Badaru, MD, Lisa Gilliam, MD, PhD, Irl Hirsch, MD, Lenna L. Liu, MD, MPH, John Neff, MD, and Joyce Yi-Frazier, PhD for the University of Washington, Beth Loots, MPH, MSW, Rebecca O'Connor, RN, Sue Kearns, RN, Mary Klingsheim, RN, Emil Buscaino, BS, Katherine Cochrane, BS, Onel Martinez, MS, and Sharla Semana, BS, for Seattle Children's Hospital, and Carla Greenbaum, MD for Benaroya Research Institute

*Centers for Disease Control and Prevention:* Giuseppina Imperatore, MD, PhD, Desmond E. Williams, MD, PhD, Henry S. Kahn, MD, Bernice Moore, MBA, Gregg W. Edward, PhD, Sharon H. Saydah, PhD

*National Institute of Diabetes and Digestive and Kidney Diseases, NIH:* Barbara Linder, MD, PhD

*Central Laboratory:* Santica M. Marcovina, PhD, ScD, Vinod P. Gaur, PhD, and Jessica Harting for the University of Washington Northwest Lipid Research Laboratories

*Coordinating Center:* Ronny Bell, PhD, MS, Ralph D'Agostino, Jr., PhD, Douglas Case, PhD, Jasmin Divers, PhD, Timothy Morgan, PhD, Daniel Beavers, PhD, Leora Henkin, MPH, MEd, Susan Moxley, BS, Gena Hargis, MPH, Donna Kronner, Maureen T. Goldstein, BA, Andrea Anderson, MS, Jeanette Andrews, MS, Abigail Lauer, MS, Scott Isom, MS, Jennifer Talton, MS for Wake Forest School of Medicine

# SUPPLEMENTARY DATA

**Supplementary Table 1.** Representativeness of SEARCH 2009 Prevalence Denominators Compared with the 2010 United States Census: The SEARCH for Diabetes in Youth Study

|                                               | U.S. 2010           | SEARCH 2009<br>prevalence population* |
|-----------------------------------------------|---------------------|---------------------------------------|
|                                               | N (%)               | N (%)                                 |
| <b>Race/ethnicity†</b>                        |                     |                                       |
| Hispanic (regardless of race)                 | 50,477,594 (16.35)  | 2,340,785 (18.81)                     |
| Non-Hispanic White                            | 196,817,552 (63.75) | 7,689,947 (61.81)                     |
| Non-Hispanic Black                            | 37,685,848 (12.21)  | 1,051,643 (8.45)                      |
| Non-Hispanic American Indian                  | 2,247,098 (0.73)    | 64,840 (0.52)                         |
| Non-Hispanic Asian, Hawaiian/Pacific Islander | 14,946,700 (4.84)   | 934,989 (7.51)                        |
| Non-Hispanic Some other Race                  | 604,265 (0.20)      | 23,256 (0.19)                         |
| Non-Hispanic Two or More Races                | 5,966,481 (1.93)    | 336,406 (2.70)                        |
| <b>Age‡</b>                                   |                     |                                       |
| 0-4                                           | 20,201,362 (6.54)   | 836,875 (6.73)                        |
| 5-9                                           | 20,348,657 (6.59)   | 832,352 (6.69)                        |
| 10-14                                         | 20,677,194 (6.70)   | 832,973 (6.69)                        |
| 15-19                                         | 22,040,343 (7.14)   | 873,940 (7.02)                        |
| <b>Education§, % (for adults ≥ 25 yrs)</b>    |                     |                                       |
| < High school graduate                        | 14.91               | 13.00                                 |
| High school graduate                          | 29.03               | 23.92                                 |
| Some college                                  | 28.13               | 29.69                                 |
| ≥ Bachelor's degree                           | 27.93               | 33.39                                 |
| <b>Income§</b>                                |                     |                                       |
| Median Household Income (US \$)               | 51,914              | 60,129                                |
| Median Family Income (US \$)                  | 62,982              | 72,292                                |

\* Data are from 2010, but we are using the prevalence areas defined by SEARCH in 2009

† Data are from 2010, using Summary File 1 (SF1)

‡ Age categories are only shown for those < 20 years, which is why they don't add up to 100%

§ Data are based on 5-year estimates from 2010 American Community Survey (ACS)
